# Supplementary figures and images for: Determination of methylarginines in infant plasma by CE-LIF
Source: Royal Society of Chemistry journal article supplement (doi:10.1039/c4ay00340c), 2014-01-01

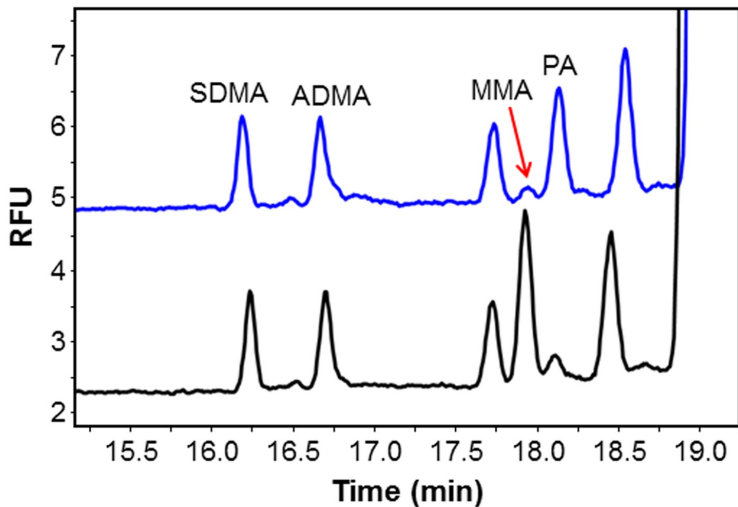

Supplement: c4ay00340c2.pdf [file c4ay00340c2.pdf]
